1 **Cross-species permissivity: structure of a goat adeno-associated virus and its**  
2 **complex with the human receptor, AAVR.**

3 **Edward E. Large<sup>1</sup>, Mark A. Silveria<sup>1</sup>, Tommi A. White<sup>2</sup> and Michael S. Chapman<sup>1\*</sup>**

4 <sup>1</sup> Department of Biochemistry, University of Missouri, Columbia, MO 65201, USA;

5 msilveria@mail.missouri.edu (M.A.S.); whiteto@missouri.edu (T.A.W.);

6 largee@missouri.edu (E.E.L.); chapmanms@missouri.edu (M.S.C.)

7 <sup>2</sup> Current address: Bayer Crop Science, 700 W Chesterfield Pkwy W, Chesterfield,

8 MO 63017 USA

9 \* Correspondence: chapmanms@missouri.edu; Tel.: +1-573-882-9825

10

11 **ABSTRACT**

12 Adeno-associated virus (AAV) is a small ssDNA satellite virus of high interest (in  
13 recombinant form) as a safe and effective gene therapy vector. AAV's human cell entry  
14 receptor (AAVR) contains Polycystic Kidney Disease (PKD) domains bound by AAV.  
15 Seeking understanding of the spectrum of interactions, goat AAVGo.1 is investigated,  
16 because its host is the species most distant from human with reciprocal cross-species  
17 cell susceptibility. The structure of AAVGo.1, solved by cryo-EM to 2.9 Å resolution, is  
18 most similar to AAV5. Through ELISA studies, it is shown that AAVGo.1 binds to human  
19 AAVR (huAAVR) more strongly than do AAV2 or AAV5, and that it joins AAV5 in a class  
20 that binds exclusively to PKD domain 1 (PKD1), in contrast to other AAVs that interact  
21 primarily with PKD2. The AAVGo.1 cryo-EM structure of a complex with a PKD12  
22 fragment of huAAVR at 2.4 Å resolution shows PKD1 bound with minimal change in  
23 virus structure, except for disordering of a neighboring surface loop. Only 4 of the 42  
24 capsid protein sequence differences between AAVGo.1 and AAV5 occur at the PKD1  
25 binding interface. These result in only minor conformational changes in AAVR,  
26 including a near rigid domain rotation with maximal displacement of the receptor by ~1  
27 Å. A picture emerges of two classes of AAV with completely different modes of binding  
28 to the same AAVR receptor, but within each class atomic interactions are mostly  
29 conserved.

30

31 **IMPORTANCE** Adeno-Associated Virus (AAV) is a small ssDNA satellite  
32 parvovirus. As a recombinant vector with a protein shell encapsidating a transgene,  
33 recombinant AAV (rAAV) is a leading delivery vehicle for gene therapy with two FDA-

34 approved treatments and 150 clinical trials for 30 diseases. The human entry receptor  
35 huAAVR has five PKD domains. To date, all serotypes, except AAV5, have interacted  
36 primarily with the second PKD domain, PKD2. Goat is the AAV host most distant from  
37 human with cross-species cell infectivity. AAVGo.1 is similar in structure to AAV5, the  
38 two forming a class with a distinct mode of receptor-binding. Within the two classes,  
39 binding interactions are mostly conserved, giving an indication of the latitude available  
40 in modulating delivery vectors.

41

42 **KEYWORDS:** AAV5, AAVGo.1, AAVR, cell entry, virus receptor, gene therapy

## 43 INTRODUCTION

44 Adeno-associated viruses (AAVs) are small single-stranded DNA viruses that can be  
45 repurposed into effective and safe gene therapy delivery vehicles (1). Primate AAV  
46 serotypes are the dominant choice for gene therapy. Several structures have been  
47 determined, starting with that of AAV2 by X-ray crystallography (2). AAV coding regions  
48 consist of two major open reading frames (ORFs): *rep* and *cap*, encoding functions  
49 needed in viral replication/DNA packaging and the capsid protein respectively (3). The  
50 Cap ORF encodes phenotypes relevant in tissue tropism and immune recognition (4, 5).

51 AAV2 was instrumental in the discovery and characterization of a human  
52 proteinaceous AAV receptor (AAVR) (6) (Fig. 1B). AAVR is a glycoprotein (N-linked/O-  
53 linked) and contains three major protein regions. The N-terminus contains a Motif At N-  
54 terminus with Eight-Cysteines (MANEC) while the central extracellular portion contains  
55 five Polycystic Kidney Disease (PKD) domains numbered 1 to 5 from N-terminus to C-  
56 terminus (7). The C-terminus has a predicted transmembrane protein domain and  
57 cytosolic domain responsible for trafficking AAV through the trans-Golgi network (TGN)  
58 (6). Experiments in mouse models and human cell lines indicate the physical  
59 interactions between primate AAVs and AAVR receptors of different species can be  
60 conserved.

61 For human AAVR (huAAVR), structures for a handful of complexes are known (8-  
62 12). The structures consist of AAV1, AAV2 or AAV5 serotypes complexed with human  
63 PKD variants (huPKD) containing domains 1-2 (huPKD12) or domains 1-5 (huPKD15).  
64 Both structure and mutant data (13, 14) consistently indicate AAV5 is unlike all other  
65 AAVs whose interactions with huAAVR are mediated primarily through PKD2. Domain-

66 swap mutants show AAV5 interacting exclusively with PKD1 (13) and the cryo-EM  
67 structures of complexes with huAAVR fragments show that the PKD1 binding site on  
68 AAV5 (9, 11) is different from the common PKD2 site for AAV2 and AAV1 (8, 9, 11).

69 Domain-swap mutants indicate a secondary role for PKD1 with AAV2 and other  
70 serotypes (13) but multiple cryo-EM structures reveal only the tightly-bound PKD2 at  
71 high resolution (8, 12, 15) It seemed possible that AAV2-like viruses bound not just to  
72 PKD2, but also to PKD1, though so weakly that PKD1 had not been seen in the AAV2  
73 structures. It was not as simple as overlaying PKD1 in an AAV5-like position and  
74 connecting it, as a single subunit chain, to PKD2 as found in AAV2, because connecting  
75 the domains required implausible stereochemistry (11).

76 AAV gene therapy utilizes primate serotypes of which AAV5 is currently the only  
77 known representative with primarily PKD1 interactions. AAV5 was initially isolated from  
78 a human penile lesion (Bantel-Schaal and Zur Hausen 1984) and is the sole primate  
79 AAV5 clade representative. The AAV5 clade also includes AAVGo.1 (16, 17), which  
80 was isolated from deceased neonatal goat ileum (Olson, Haskell et al. 2004). Both  
81 recombinant AAV5 and AAVGo.1 can transduce at equivalent levels in primate and  
82 ruminant cell lines (Arbetman, Lochrie et al. 2005, Qiu, Cheng et al. 2006). Efficient  
83 transduction of primate and ruminant cell lines by both AAV5 and AAVGo.1 represents  
84 the broadest divergence between AAV host species that are reciprocally permissive to  
85 cross-species infection. Given the strong evidence for AAV5 interactions with PKD1 we  
86 investigated potential interactions of AAVGo.1 with huAAVR.

87 Here, binding of AAVGo.1, AAV5 and AAV2 to domain combinations of huAAVR  
88 are compared by ELISA. Then high-resolution structures are determined by cryo-EM of

89 AAVGo.1 alone, and in complex with a PKD12 fragment of huAAVR. These are  
90 compared to corresponding structures of AAV5 to understand the diversity of  
91 interactions that are compatible with productive receptor-binding.

## 92 **RESULTS**

### 93 **AAVGo.1 binds huAAVR.**

94 HuAAVR binds to AAV5, AAVGo.1 and AAV2 with comparable order-of-  
95 magnitude avidities as measured by ELISA binding using huAAVR ectodomain  
96 constructs. In contrast to AAV2, the binding of both AAVGo.1 and AAV5 is mediated  
97 mostly through the PKD1 domain. Both have stronger overall binding avidity than AAV2,  
98 AAVGo.1 having the strongest yet measured (Figure 1).

### 99 **Structure of AAV-Go.1 and its huAAVR receptor complex.**

100 Cryo-EM single particle analysis (SPA) yielded reconstructions at 2.9 Å  
101 resolution for native AAVGo.1 and 2.5 Å for the AAVR PKD12 complex. Sharpened  
102 maps provided detail for atomic modeling and were interpretable from residue 209 to  
103 726 of the capsid protein in both reconstructions with one exception. In the receptor  
104 complex, residues 477 to 482 are less ordered and only traceable in maps low-pass  
105 filtered to 10 Å resolution. By convention, the numbering of VP1 is used, even though it  
106 constitutes only 10% of the capsid subunits. The majority of the subunit common to  
107 VP1-3 is seen in the 60-fold averaged reconstructions, starting at residue 209, before  
108 βA. The N-terminus of VP3 is residue 193 by VP1 numbering, so the atomic model  
109 accounts for 517 of 534 (96.8%) VP3 residues.

110           The native AAVGo.1 capsid has a similar protein fold and surface topology to  
111 AAV5 structures (9, 11, 18). The capsid core, comprised of a jellyroll fold found in many  
112 virus structures (19), and a single  $\alpha$ -helix ( $\alpha$ A) are the most conserved features of  
113 AAVs, and AAVGo.1 is no exception. The AAVGo.1 core jellyroll has the standard  
114 topology with backbone chain alternating between two stacked antiparallel  $\beta$ - sheets  
115 (almost rolling into a single tube). The sheet forming the inner surface of the capsid  
116 consists of  $\beta$ -strands B, I, D and G that alternate with the “CHEF” strands of the outer  
117 sheet, together with a 5<sup>th</sup> inner strand,  $\beta$ A.  $\beta$ A is seen in many parvoviruses (20) at the  
118 edge of the BIDG sheet, running antiparallel to and turning directly into  $\beta$ B. Seven loops  
119 that connect strands of the BIDG and CHEF sheets encode much of the functionality of  
120 the capsid protein. Within the loops are regions of low sequence conservation that  
121 decorate the outer surface of the virus and these variable regions (VR) are enumerated  
122 as VR-I to VR-IX (21). VR-I (262-268) is found between  $\beta$ B and  $\beta$ C strands (BC loop),  
123 VR-II (362-330) is found in the DE loop, VR-III (380-388) is in the EF loop, VR-IV to VR-  
124 VIII (449-468, 487-504, 525-541, 544-556, and 579-594) are located in the GH loop and  
125 the C-terminus contains an additional VR-IX (704-711) after the last  $\beta$ I strand. These  
126 VR loops serve as guideposts for understanding AAV:AAVR interactions (8-12).

127           AAVGo.1 and AAV5 capsid proteins have high homology (94%). All 42 amino  
128 acid differences occurring in the VP3 region (more specifically C-terminal of AAVGo.1  
129 VP1 residue 376) and the majority of these differences are located on the exterior of the  
130 capsid (17).

131           When comparing PKD1 as bound to AAVGo.1 or AAV5 we see an overall shift in  
132 the receptor position (Figure 3). Displacements of up to 1 Å are observed at some

133 backbone carbons (Figure 3B, C). The shift appears to be a rotation about Arg<sub>353</sub> which  
134 remains essentially unmoved (Figure 3D). Displacements become greater with distance  
135 from Arg<sub>353</sub>. What could cause this rotation between one serotype and another that are  
136 so similar? The key perhaps lies in the four residues that are changed in the binding  
137 footprint of AAVGo.1 when compared with AAV5.

138         The binding site formed by AAV5 and PKD1 has previously been examined (9,  
139 11). Here, our attention is focused on the four viral residues within the binding interface  
140 that are different between AAVGo.1 and AAV5. Central to the binding site is human  
141 PKD1 residue Arg<sub>353</sub>, which makes contact with AAV5 Ser<sub>531</sub> and Gly<sub>545</sub>. In AAVGo.1,  
142 the equivalent residues to Ser<sub>531</sub> and Gly<sub>545</sub> are, respectively, Ala<sub>533</sub> and Asp<sub>547</sub> (Figure  
143 2C, D & Figure 4B, C). Both AAV5 Ser<sub>531</sub> and AAVGo.1 Ala<sub>533</sub> make contact  
144 (exclusively) with Arg<sub>353</sub> ( $\leq 3.5$  Å). AAVGo.1 Ala<sub>533</sub> contacts AAVR Arg<sub>353</sub> while the  
145 corresponding AAV5 Ser<sub>531</sub> adds to the surface contact. Neighboring AAV5 Gly<sub>545</sub>  
146 makes minimal contact with AAVR Arg<sub>353</sub>, while the corresponding AAVGo.1 Asp<sub>547</sub>  
147 makes several van der Waals contacts in addition to AAVR Arg<sub>353</sub> (Figure 4B). In  
148 AAVGo.1 Pro<sub>545</sub> replaces AAV5 Leu<sub>543</sub> (Figure 2E, F & Figure 4D). Both are involved in  
149 somewhat different virus-receptor van der Waals contacts, probably of similar extents.  
150 Lastly, in AAVGo.1 Ser<sub>542</sub> replaces AAV5 Ala<sub>540</sub>, adding a hydroxyl group that forms a  
151 polar interaction with AAVR Asn<sub>395</sub> (Figure 2E, F & Figure 4D). In summary, there are  
152 some detailed differences, the net effect of which is a modest increase in contacts and  
153 polar interactions for the AAVGo.1 complex compared to AAV5.

154         The largest difference, by sequence, is a double insertion in AAVGo.1 relative to  
155 the AAV5 sequence: L<sub>477</sub>(SS)G<sub>478</sub>. The region is disordered in AAVGo.1 receptor



156 complex, lacking density between Thr<sub>477</sub> and Ser<sub>482</sub> in the sharpened map. When low-  
157 pass filtered to 10 Å resolution, the backbone can be traced readily, indicating that the  
158 region is dynamic. In unbound AAV5 and AAVGo.1, this loop is not disordered, and it  
159 appears less disordered in the AAV5-AAVR complex. Thus, it does appear that the  
160 combination of receptor-binding and the tandem serine insertion increases the disorder.  
161 Indeed, the map recovered by low-pass filtering is close to the C-terminal end of PKD1,  
162 discussed below.

## 163 **DISCUSSION**

164 The largest difference in sequence between AAVGo.1 and AAV5 is the tandem  
165 serine insertion in variable region V (VR-V), a site that is more mobile than other regions  
166 of the surface, witness the fact that it is observed only in a lower resolution map low-  
167 pass filtered to 10 Å. The difference is within the epitope of a neutralizing monoclonal  
168 antibody, mAb HL2476 (22), and if the mAb were to be representative of natural  
169 neutralizing polyclonal antibodies, it is possible that the difference reflects selection  
170 through immune-evasion. We note that the loop that is extended in AAVGo.1 by the  
171 two-residue insertion is in the general vicinity of the final residue observed in PKD1,  
172 about 6 Å away, and one cannot exclude the possibility of an additional interaction  
173 between VR-V of AAVGo.1 and the interdomain linker between PKD1 and PKD2 in  
174 AAVR.

175 Prior to this work, most complexes between AAV and AAVR were of similar  
176 structure, like the AAV2 complex (8, 9, 12), with a single exception, that of AAV5 (9, 11).  
177 At first approximation, the binding of AAVGo.1 to huAAVR is similar to that of AAV5, so  
178 the single exception becomes a second class in terms of the mode of binding. Between

179 the two classes, the modes of binding are completely different. Within each class, the  
180 diversity in structure of the virus-receptor interface is much more modest. It is  
181 anticipated that within and between binding classes, diversity will yield distinct  
182 transduction efficiencies, tissue tropism and antibody neutralization profiles.

## 183 **MATERIALS AND METHODS**

### 184 **Expression and purification of AAVGo.1 and AAVR constructs.**

185 AAVGo.1, AAV2 and AAV5 Virus-Like Particles (VLPs) were produced using Sf9  
186 cells and purified via ultracentrifugation in a cesium chloride gradient, repeated 4 times,  
187 and yielding a final concentration of 38.8 mg/ml (10). Sample purity and concentration  
188 were evaluated using nanodrop, SDS-PAGE and negatively stained electron  
189 microscopy using a JEOL JEM-1400 120kV Transmission Electron Microscope (TEM).  
190 AAVR fragment constructs (His<sub>6</sub>PKD1; His<sub>6</sub>PKD12; and His<sub>6</sub>PKD15) were expressed  
191 and purified as previously described (10).

### 192 **Enzyme-Linked Immunosorbent Assay (ELISA).**

193 ELISA assays were carried out in triplicate using a modified direct ELISA protocol  
194 (6, 11). AAV2, AAV5, or AAVGo.1 VLPs (2.5 µg/ml) were incubated in ELISA plates  
195 (Corning Costar # 9018) in 100 mM NaHCO<sub>3</sub> (pH 9.6) and washed with TBST buffer  
196 (0.05% TWEEN in TBS). Plates were incubated with N-terminally His-tagged AAVR  
197 (His<sub>6</sub>PKD1; His<sub>6</sub>PKD12; or His<sub>6</sub>PKD15) and detected with anti-6x His tag horseradish  
198 peroxidase (HRP) (abcam #ab1187) antibody. 3,3',5,5'-Tetramethylbenzidine (TMB)  
199 ELISA Substrate (abcam #ab171523) was added to each well and development was  
200 stopped using 1 M hydrochloric acid. The optical density of plates was evaluated at 450

201 nm using a microplate reader (BioTek Synergy H1 Hybrid Multi-Mode Reader). EC<sub>50</sub>  
202 values were estimated using the ATT BioQuest® - EC50 calculator.

### 203 **TEM/Single Particle Cryo-EM data acquisition and 3D image reconstruction.**

204 Native AAVGo.1 and AAVGo1:PKD12 complexes were prepared and imaged as  
205 previously described for AAV2 and AAV5 (11, 12). Briefly, AAVGo.1 was  
206 dialyzed/diluted into HN buffer (25 mM HEPES pH 7.4 and 150 mM NaCl) at 0.33 mg/ml  
207 and PKD12 at 0.75 mg/ml. Grids had an ultrathin continuous carbon film layered on  
208 Lacey carbon supports (400 mesh; copper; Ted Pella # 01824). The grids were glow  
209 discharged using a PELCO easiGlow™ Glow Discharge Cleaning System. After  
210 application of 2 µl of sample, native AAVGo.1 grids were blotted once and plunged  
211 directly into liquid ethane using an FEI Mark IV Vitrobot (force = 4, time = 2, temp = 25,  
212 humidity = 100). PKD12 complexes grids were prepared by adding 2 µl AAVGo.1 to the  
213 grid with a 2 minute incubation time. The grid was then wicked with Whatman filter  
214 paper (grade 595) and 2 µL of receptor was immediately added followed by blotting and  
215 plunging via Vitroblot (force = 4, time = 3, temp = 25, humidity = 100).

216 Cryo-EM grids were screened using an FEI Tecnai F30 Twin 300 kV TEM in  
217 preparation for single particle Cryo-EM. Native AAVGo.1 and AAVGo.1:PKD12  
218 complexes were imaged using an FEI Titan Krios equipped with a Gatan K3 digital  
219 camera in super-resolution mode at a dose rate of 40 frames per 3.12 second exposure  
220 (Table 1). Automated micrograph data collection was enabled using Leginon (23).

221 Relion 3.1.0 was used to process the data for native AAVGo.1 (24). 713  
222 micrographs were motion corrected using Relion's own implementation and CTFFind-  
223 4.1 was used for CTF correction (25). A total of 246,094 particles were picked with

224 Relion autopick, which were culled down to 188,650 through several rounds of 2D  
225 classification. An additional round of 3D classification resulted in 140,568 particles. 3D  
226 refinement produced a map of 3.62 Å (gold-standard FSC<sub>0.143</sub>). Post-processing,  
227 including per particle CTF and motion corrections and masking resulted in a final  
228 resolution of 2.93 Å.

229 Relion 3.1.1 was used for the complex of AAVR PKD12 with AAVGo.1 (24). A  
230 total of 1204 micrographs were motion corrected with MOTIONCOR2 (26) and CTF  
231 estimation was carried out using CTFFind-4.1 (25). From 1127 micrographs, 208921  
232 particles were picked using Relion's Autopick with the native AAVGo.1 structure as a  
233 template. 3D Refinement was carried out directly on the extracted particles and 3D  
234 classification was used with C1 symmetry imposed resulting in 71095 particles for 3D  
235 reconstruction. Per particle CTF and motion correction were performed followed by 3D  
236 auto-refinement with I1 symmetry resulted in an unmasked structure at 2.55 Å. Masking  
237 resulted in a final resolution of 2.36 Å (gold-standard FSC<sub>0.143</sub>).

### 238 **Model building and structure refinement.**

239 A preliminary model for native AAVGo.1 was generated using the native AAVGo.1 VP3  
240 protein sequence threaded into the 2.1 Å AAV5 structure (PDBid: 7kp3) in Coot (27).  
241 The starting model for the PKD1 domain of the receptor came from the 2.5 Å  
242 AAV5:PKD1-2 structure (PDBid: 7kpn). The models and imaging parameters were  
243 refined using RSRef 0.5.6 (28) with a final real-space correlation coefficient (CC) of 0.87  
244 for native AAVGo.1 and 0.83 for complexed AAVGo.1:PKD1. (Correlation coefficients  
245 were calculated using all map grid points within 2.0 and 2.4 Å of all atoms, respectively.)  
246 Manual model adjustments were executed in Coot 0.8.9.2.

## 247 ACKNOWLEDGMENTS

248           The Chapman lab is grateful for the contributions of the University of Missouri  
249 Electron Microscopy Core the Purdue Cryo-EM Facility. Thank you also to Dr. Jianming  
250 Qiu and Dr. David Pintel for AAVGo.1 and AAV5 Rep-Cap plasmids. This work  
251 supported by the National Institute of Health R35 GM122564. Purdue Cryo-EM Facility  
252 data acquisition was supported by National Institute of General Medical Sciences Grant  
253 U24 GM116789. Atomic models and cryo-EM maps will be made available at the PDB  
254 and EMDB.

## 255 REFERENCES

- 256 1. Berns KI, Muzyczka N. 2017. AAV: An Overview of Unanswered Questions. *Hum*  
257 *Gene Ther* 28:308-313.
- 258 2. Xie Q, Bu W, Bhatia S, Hare J, Somasundaram T, Azzi A, Chapman MS. 2002.  
259 The atomic structure of adeno-associated virus (AAV-2), a vector for human  
260 gene therapy. *Proc Natl Acad Sci U S A* 99:10405-10.
- 261 3. Berns KI, Giraud C. 1996. Biology of adeno-associated virus. *Curr Top Microbiol*  
262 *Immunol* 218:1-23.
- 263 4. Meyer NL, Chapman MS. 2021. Adeno-associated virus (AAV) cell entry:  
264 structural insights. *Trends Microbiol* doi:10.1016/j.tim.2021.09.005.
- 265 5. Large EE, Silveria MA, Zane GM, Weerakoon O, Chapman MS. 2021. Adeno-  
266 Associated Virus (AAV) Gene Delivery: Dissecting Molecular Interactions upon  
267 Cell Entry. *Viruses* 13.
- 268 6. Pillay S, Meyer NL, Puschnik AS, Davulcu O, Diep J, Ishikawa Y, Jae LT, Wosen  
269 JE, Nagamine CM, Chapman MS, Carette JE. 2016. An essential receptor for  
270 adeno-associated virus infection. *Nature* 530:108-12.
- 271 7. Poon MW, Tsang WH, Chan SO, Li HM, Ng HK, Waye MM. 2011. Dyslexia-  
272 associated kiaa0319-like protein interacts with axon guidance receptor nogo  
273 receptor 1. *Cell Mol Neurobiol* 31:27-35.
- 274 8. Zhang R, Cao L, Cui M, Sun Z, Hu M, Zhang R, Stuart W, Zhao X, Yang Z, Li X,  
275 Sun Y, Li S, Ding W, Lou Z, Rao Z. 2019. Adeno-associated virus 2 bound to its  
276 cellular receptor AAVR. *Nature Microbiology* 4:675-682.
- 277 9. Zhang R, Xu G, Cao L, Sun Z, He Y, Cui M, Sun Y, Li S, Li H, Qin L, Hu M, Yuan  
278 Z, Rao Z, Ding W, Rao Z, Lou Z. 2019. Divergent engagements between adeno-  
279 associated viruses with their cellular receptor AAVR. *Nat Commun* 10:3760.
- 280 10. Meyer N, Davulcu O, Xie Q, Silveria M, Zane G, Large E, Chapman M. 2020.  
281 Expression and Purification of Adeno-associated Virus Virus-like Particles in a

- 282 Baculovirus System and AAVR Ectodomain Constructs in *E. coli*. *Bio-Protocol*  
283 10:e3513.
- 284 11. Silveria MA, Large EE, Zane GM, White TA, Chapman MS. 2020. The Structure  
285 of an AAV5-AAVR Complex at 2.5 Å Resolution: Implications for Cellular Entry  
286 and Immune Neutralization of AAV Gene Therapy Vectors. *Viruses* 12:1326.
- 287 12. Meyer NL, Hu G, Davulcu O, Xie Q, Noble AJ, Yoshioka C, Gingerich DS,  
288 Trzynka A, David L, Stagg SM, Chapman MS. 2019. Structure of the gene  
289 therapy vector, adeno-associated virus with its cell receptor, AAVR. *Elife*  
290 8:e44707.
- 291 13. Pillay S, Zou W, Cheng F, Puschnik AS, Meyer NL, Ganaie SS, Deng X, Wosen  
292 JE, Davulcu O, Yan Z, Engelhardt JF, Brown KE, Chapman MS, Qiu J, Carette  
293 JE. 2017. Adeno-associated Virus (AAV) Serotypes Have Distinctive Interactions  
294 with Domains of the Cellular AAV Receptor. *J Virol* 91:e00391-17.
- 295 14. Dudek AM, Pillay S, Puschnik AS, Nagamine CM, Cheng F, Qiu J, Carette JE,  
296 Vandenberghe LH. 2018. An Alternate Route for Adeno-associated Virus (AAV)  
297 Entry Independent of AAV Receptor. *J Virol* 92.
- 298 15. Hu G, Silveria MA, Chapman MS, Stagg SM. 2022. Adeno-associated Virus  
299 Receptor-binding: Flexible Domains and Alternative Conformations through cryo-  
300 Electron Tomography of AAV2 and AAV5 complexes. *bioRxiv*  
301 doi:10.1101/2022.01.10.475736:2022.01.10.475736.
- 302 16. Qiu J, Cheng F, Pintel D. 2006. Molecular characterization of caprine adeno-  
303 associated virus (AAV-Go.1) reveals striking similarity to human AAV5. *Virology*  
304 356:208-16.
- 305 17. Arbetman AE, Lochrie M, Zhou S, Wellman J, Scallan C, Doroudchi MM,  
306 Randlev B, Patarroyo-White S, Liu T, Smith P, Lehmkuhl H, Hobbs LA, Pierce  
307 GF, Colosi P. 2005. Novel caprine adeno-associated virus (AAV) capsid (AAV-  
308 Go.1) is closely related to the primate AAV-5 and has unique tropism and  
309 neutralization properties. *J Virol* 79:15238-45.
- 310 18. Govindasamy L, DiMattia MA, Gurda BL, Halder S, McKenna R, Chiorini JA,  
311 Muzyczka N, Zolotukhin S, Agbandje-McKenna M. 2013. Structural insights into  
312 adeno-associated virus serotype 5. *J Virol* 87:11187-99.
- 313 19. Chapman MS, Liljas L. 2003. Structural folds of viral proteins. *Adv Protein Chem*  
314 64:125-96.
- 315 20. Tsao J, Chapman MS, Agbandje M, Keller W, Smith K, Wu H, Luo M, Smith TJ,  
316 Rossmann MG, Compans RW, et al. 1991. The three-dimensional structure of  
317 canine parvovirus and its functional implications. *Science* 251:1456-64.
- 318 21. Govindasamy L, Padron E, McKenna R, Muzyczka N, Kaludov N, Chiorini JA,  
319 Agbandje-McKenna M. 2006. Structurally mapping the diverse phenotype of  
320 adeno-associated virus serotype 4. *J Virol* 80:11556-70.
- 321 22. Jose A, Mietzsch M, Smith JK, Kurian J, Chipman P, McKenna R, Chiorini J,  
322 Agbandje-McKenna M. 2019. High-Resolution Structural Characterization of a  
323 New Adeno-associated Virus Serotype 5 Antibody Epitope toward Engineering  
324 Antibody-Resistant Recombinant Gene Delivery Vectors. *J Virol* 93.
- 325 23. Suloway C, Pulokas J, Fellmann D, Cheng A, Guerra F, Quispe J, Stagg S,  
326 Potter CS, Carragher B. 2005. Automated molecular microscopy: the new  
327 Legion system. *J Struct Biol* 151:41-60.

- 328 24. Zivanov J, Nakane T, Forsberg BO, Kimanius D, Hagen WJ, Lindahl E, Scheres  
329 SH. 2018. New tools for automated high-resolution cryo-EM structure  
330 determination in RELION-3. *Elife* 7.
- 331 25. Rohou A, Grigorieff N. 2015. CTFFIND4: Fast and accurate defocus estimation  
332 from electron micrographs. *J Struct Biol* 192:216-21.
- 333 26. Zheng SQ, Palovcak E, Armache JP, Verba KA, Cheng Y, Agard DA. 2017.  
334 MotionCor2: anisotropic correction of beam-induced motion for improved cryo-  
335 electron microscopy. *Nat Methods* 14:331-332.
- 336 27. Emsley P, Lohkamp B, Scott WG, Cowtan K. 2010. Features and development of  
337 Coot. *Acta Crystallogr D Biol Crystallogr* 66:486-501.
- 338 28. Chapman MS, Trzynka A, Chapman BK. 2013. Atomic modeling of cryo-electron  
339 microscopy reconstructions--joint refinement of model and imaging parameters. *J*  
340 *Struct Biol* 182:10-21.
- 341

342 FIGURES

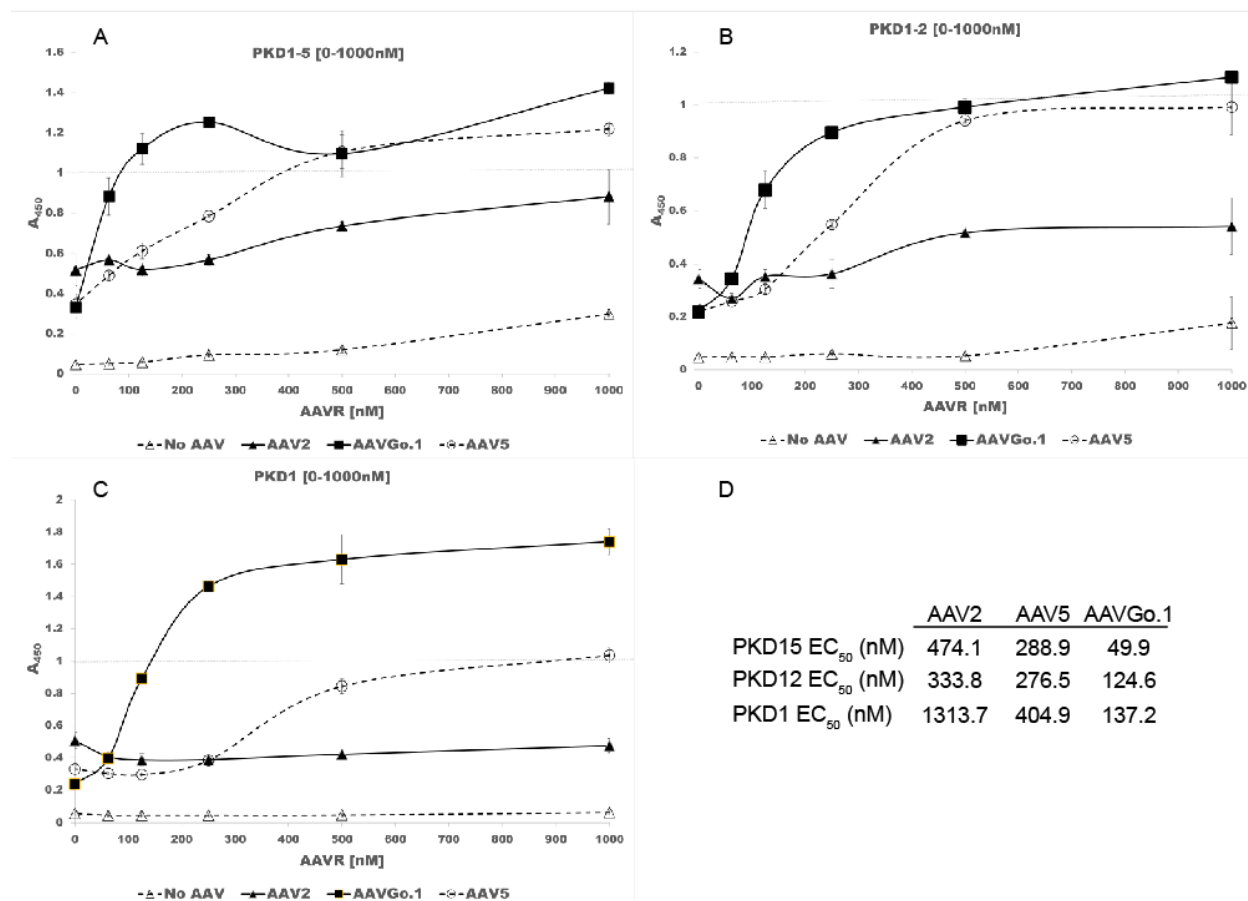

344 *Figure 1: AAVGo.1 interacts with PKD domains. A) PKD15 ELISA. B) PKD12 ELISA. C)*

345 *PKD1 ELISA. D) EC<sub>50</sub> values determined from panels A-C.*



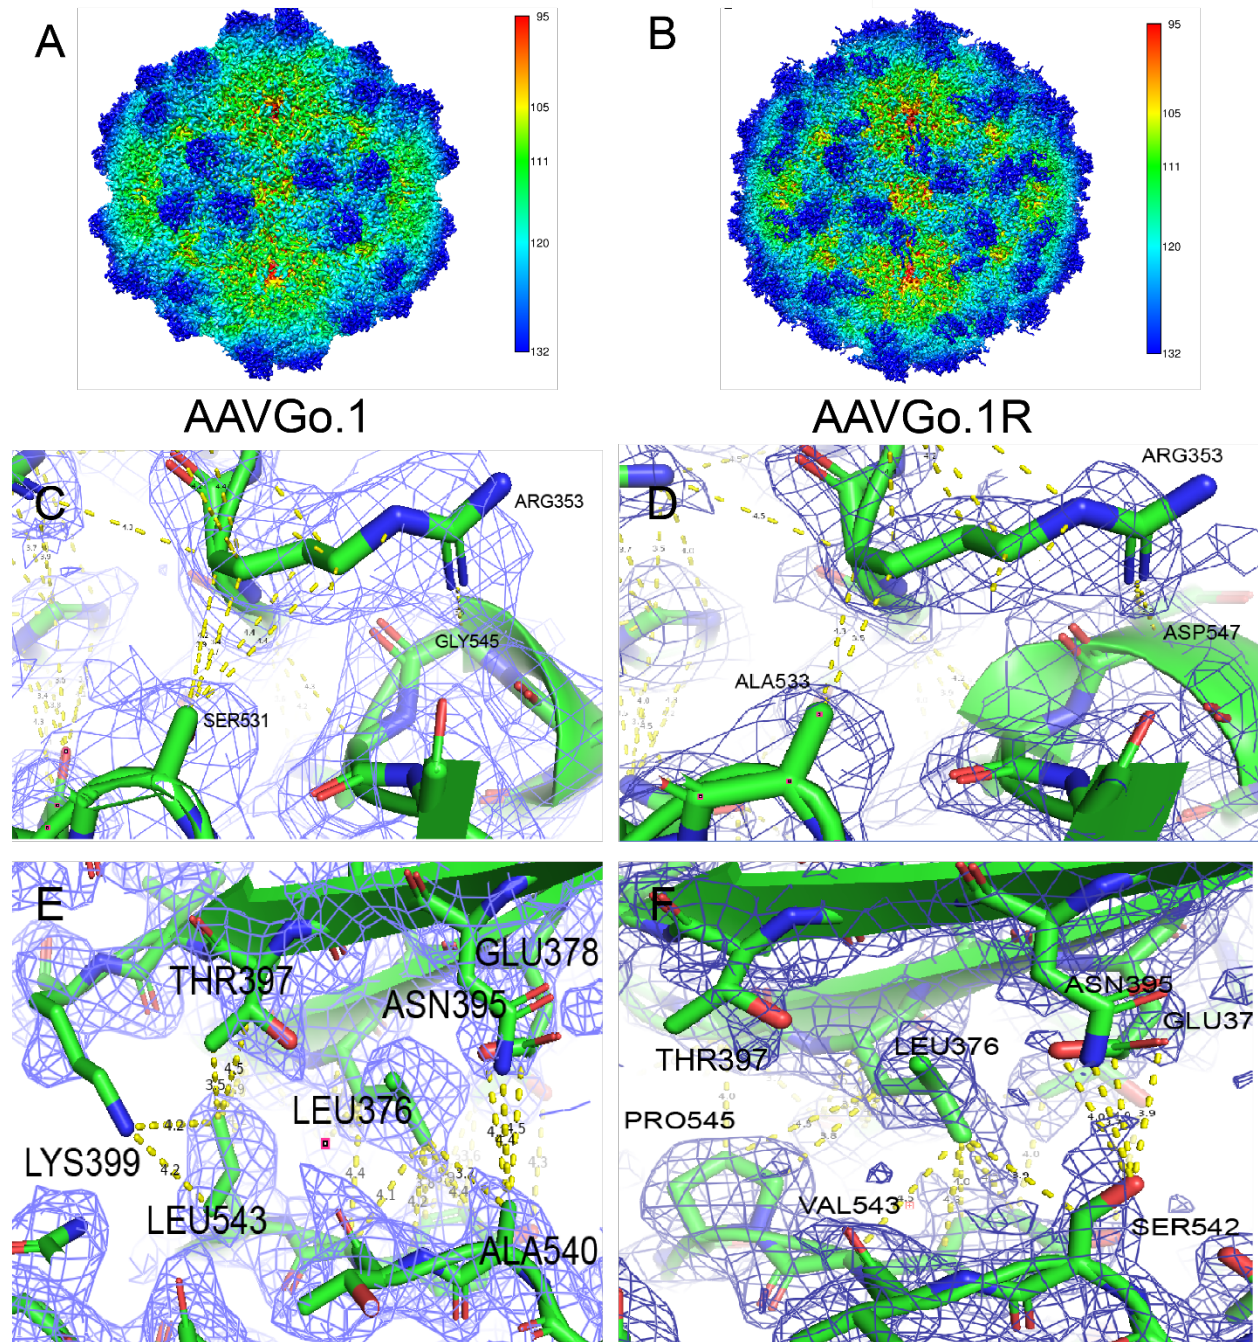

347 *Figure 2: The receptor site on AAVGo is similar to AAV5 with some key differences. A)*  
348 *Native reconstruction of AAVGo.1, colored by distance from the virus center. B)*  
349 *AAVGo.1 complexed with PKD1. The AAV5 PKD1 N-terminus begins above the edge of*  
350 *the 5-fold pore and descends towards the 2-fold axis (Silveria, Large et al. 2020).*

351 *Panels C – E together show the environment for the four interface residues that differ*  
352 *between AAV5 (left) and AAVGo.1 (right). Atomic models are overlaid on maps*  
353 *contoured at 1.5  $\sigma$ . C) The AAV5 environment around AAVR-Arg<sub>353</sub>, AAV5-Ser<sub>531</sub> and*  
354 *AAV5-Gly<sub>545</sub>. D) The corresponding AAVGo.1 environment around huAAVR-Arg<sub>353</sub>,*  
355 *AAVGo.1-Ala<sub>533</sub> and AAVGo.1-Asp<sub>547</sub>. E) The AAV5 environment around Leu<sub>543</sub> and*  
356 *Ala<sub>540</sub>. D) The corresponding AAVGo.1 environment around Pro<sub>545</sub> and Ser<sub>542</sub>.*

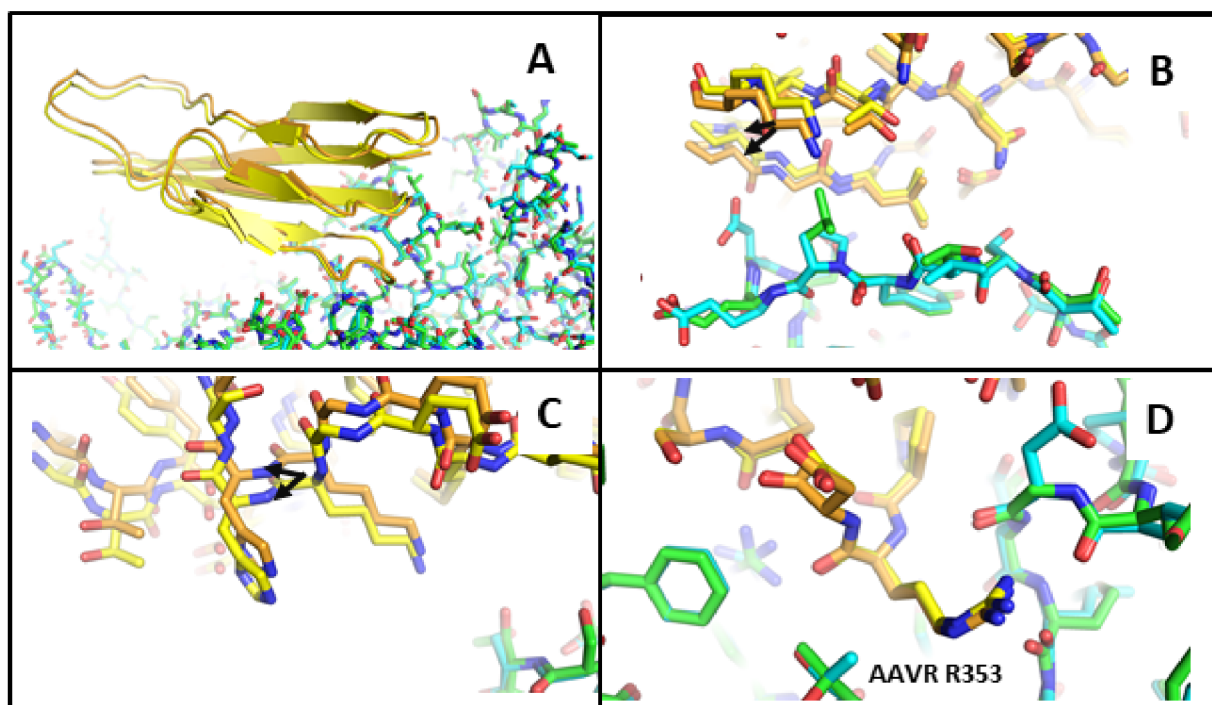

358 *Figure 3: A rotation in the PKD1 position is observed when comparing its bound*  
359 *structure to AAVGo.1 versus AAV5. AAVGo.1 is colored with cyan carbons while AAV5*  
360 *is colored with green carbons. The PKD1 from the AAVGo.1 structure is colored with*  
361 *yellow carbons and the PKD1 from the AAV5 structure is colored with orange carbons.*  
362 *A) The overall rotation is observed in the PKD1 position when bound to either AAVGo.1*  
363 *or AAV5. B) A close up shows the PKD1-viral interface near AAVR Lys<sub>399</sub>. Arrows*  
364 *indicate a pair of corresponding atoms that differ by ~1 Å. C) This view is near AAVR*  
365 *His<sub>363</sub>. D) On the lowermost turn in panel A, AAVR Arg<sub>353</sub> is bound more closely in a*  
366 *pocket on the AAV surface, and there is little difference between AAVGo.1 and AAV5.*  
367 *Thus the overall displacement is approximately a rotation about an R353 pivot point.*

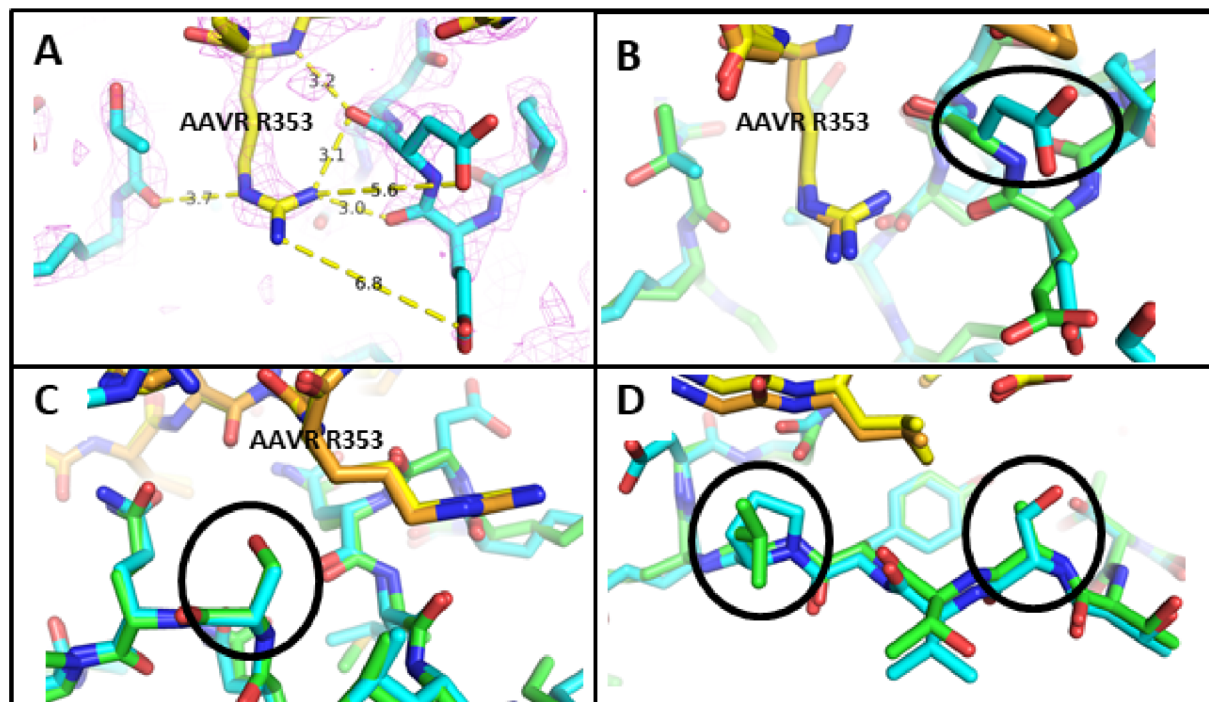

369 *Figure 4: Comparison of the virus-receptor complexes of AAVGo.1 with AAV5. A)*  
370 *AAVR (yellow carbons) bound to AAVGo.1 (cyan carbons) near AAVR-Arg<sub>353</sub>. B) The*  
371 *AAV5 complex structure (PDBid 7kpn) is overlaid with green / orange carbon atoms.*  
372 *Circled are the substitutions of Asp<sub>547</sub> for Gly<sub>545</sub> in AAVGo.1 (vs. AAV5) providing a*  
373 *more complementary, negatively charged binding pocket for AAVR-Arg<sub>353</sub>. C) Circled is*  
374 *the substitution of AAVGo.1 Ala<sub>533</sub> for AAV5 Ser<sub>531</sub>. D) Within the circles, Pro<sub>545</sub> and*  
375 *Asp<sub>547</sub> replace AAV5 residues Leu<sub>543</sub> and Gly<sub>545</sub>.*

376 **TABLES**

377 *Table 1: Cryo-EM data acquisition and processing*

| <b>Data Collection</b>                | <b>AAVGo.1</b>           | <b>AAVGo.1R</b> |
|---------------------------------------|--------------------------|-----------------|
| Magnification (x)                     | 64,000                   | 64,000          |
| Voltage (kV)                          | 300                      | 300             |
| Electron Exposure (e/Å <sup>2</sup> ) | 35.4                     | 32.9            |
| Defocus Range (μm)                    | -0.7 to -2.0             | -0.7 to -2.0    |
| Pixel Size (Å)                        | 0.664                    | 0.664           |
| <b>Data Processing</b>                |                          |                 |
| Motion Correction                     | Relion 3.1.1<br>CTFFIND- | Relion 3.1.1    |
| CTF Estimation                        | 4.1                      | CTFFIND-4.1     |
| Symmetry Imposed                      | I1                       | I1              |
| Initial Particle Images               | 246,094                  | 208,921         |
| Final Particle Images                 | 140,568                  | 71,095          |
| Map Resolution                        | 2.93                     | 2.36            |
| FSC Threshold                         | 0.143                    | 0.143           |

378

379
